# Supplementary material
Source: publisher site journal article supplement (https://www.dovepress.com/article/348899)
Supplement: Supplementary file 1 [file get_supplementary_file.php]

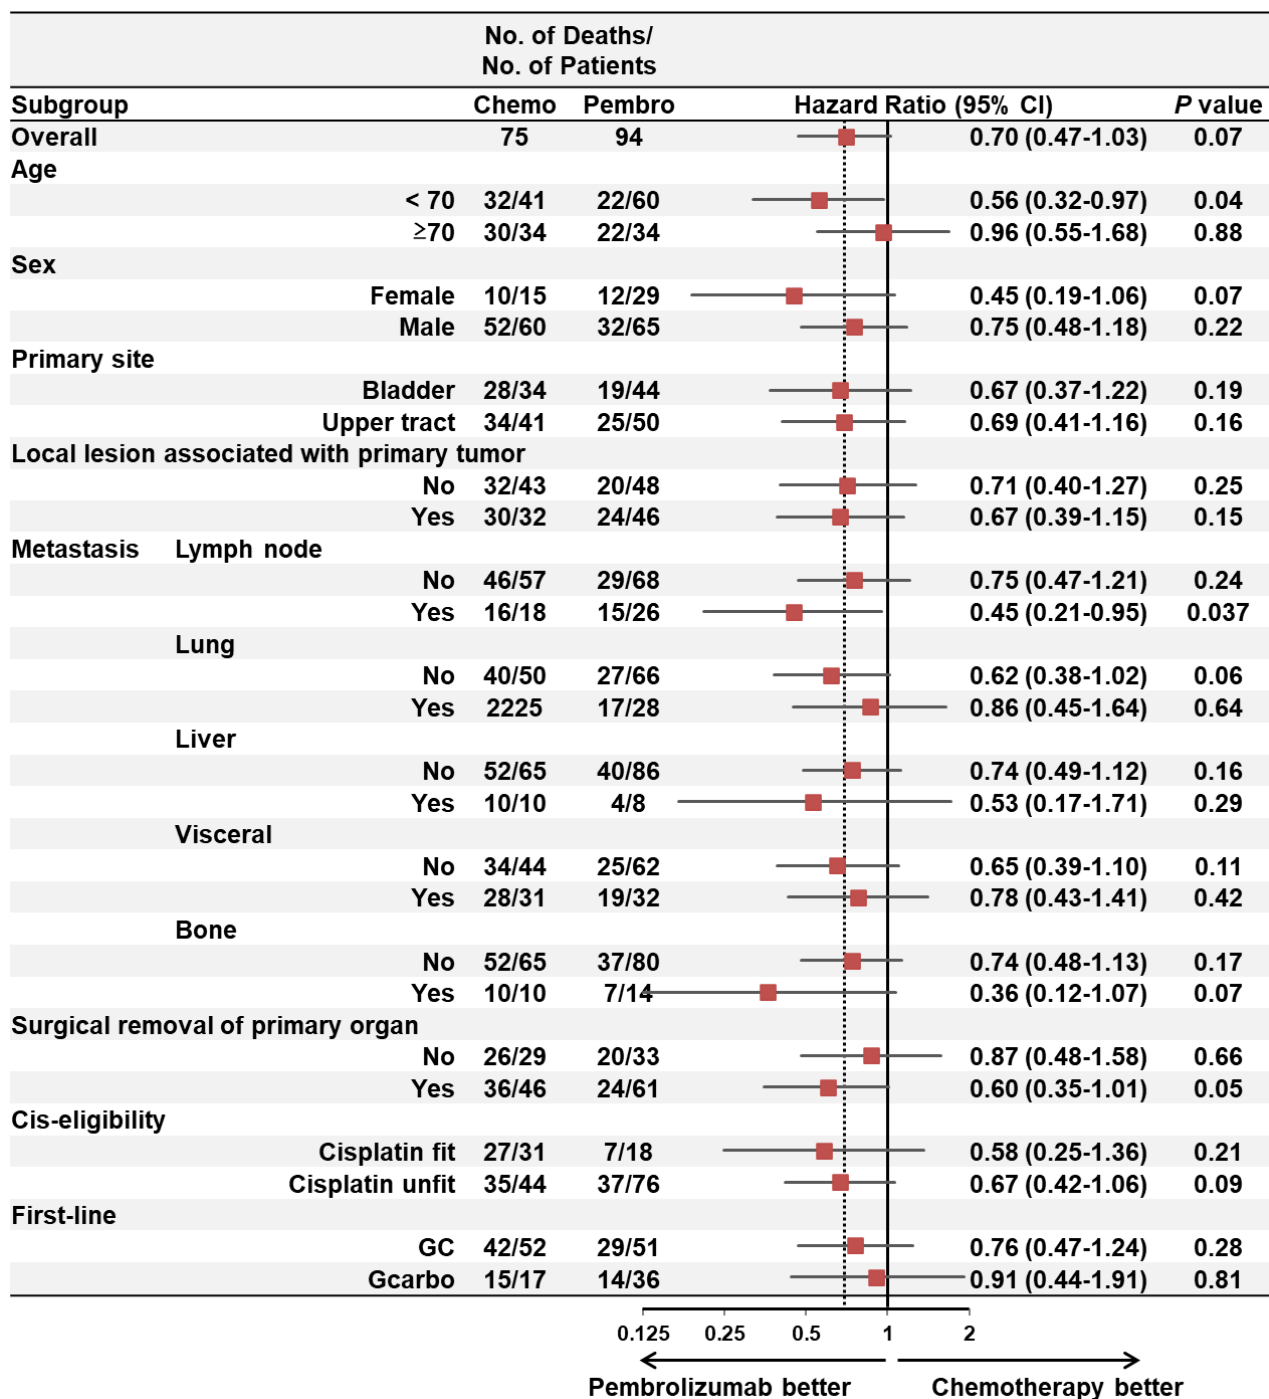

### Supplementary Figure S1. An analysis of overall survival in key subgroups in unweighted population.

The dashed line indicates the rate of overall survival in the entire population.

Abbreviations: HR, hazard ratio; CI, confidence interval; GC, gemcitabine plus cisplatin combination chemotherapy; GCarbo, gemcitabine plus carboplatin combination chemotherapy.
